# Supplementary material for: Prospective Assessment of Systemic MicroRNAs as Markers of Response to Neoadjuvant Chemotherapy in Breast Cancer
Source: MDPI journal article supplement (doi:10.3390/cancers12071820), 2020-07-07
Supplement: s1 [file s1]

# Supplementary Material: Prospective Assessment of Systemic MicroRNAs as Markers of Response to Neoadjuvant Chemotherapy in Breast Cancer

Andrew McGuire, Maire-Caitlin Casey, Ronan M. Waldron, Helen Heneghan, Olga Kalinina, Emma Holian, Ailbhe McDermott, Aoife J. Lowery, John Newell, Róisín M. Dwyer, Nicola Miller, Maccon Keane, James A.L. Brown and Michael J. Kerin

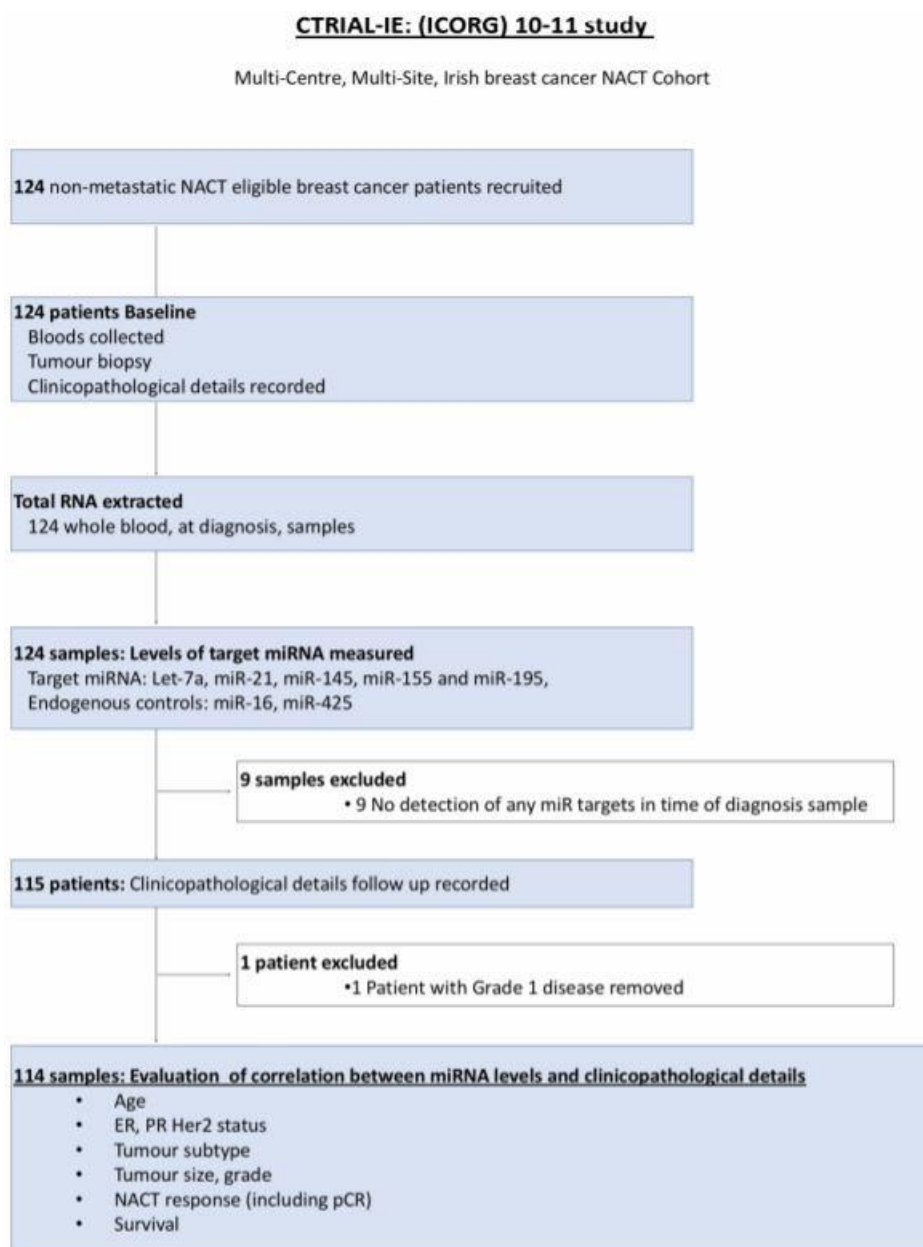

**Figure S1.** Study Enrollment and analysis Flow Diagram. Illustrates cohort recruitment and sample analysis workflow. Final  $n = 114$  patient samples analyzed.

| Odds Ratio ( 95 CI)        |                             |
|----------------------------|-----------------------------|
| <i>Dependent variable:</i> |                             |
| Responders                 |                             |
| Let.7a                     | 0.874 (0.522, 1.463)        |
| Constant                   | 0.820 (0.559, 1.202)        |
| Observations               | 108                         |
| R <sup>2</sup>             | 0.003                       |
| $\chi^2$                   | 0.264 (df = 1)              |
| <i>Note:</i>               | *p<0.1; **p<0.05; ***p<0.01 |

  

| Odds Ratio ( 95 CI)        |                             |
|----------------------------|-----------------------------|
| <i>Dependent variable:</i> |                             |
| Responders                 |                             |
| miR.145                    | 1.004 (0.522, 1.931)        |
| Constant                   | 0.845 (0.578, 1.236)        |
| Observations               | 107                         |
| R <sup>2</sup>             | 0.00000                     |
| $\chi^2$                   | 0.0001 (df = 1)             |
| <i>Note:</i>               | *p<0.1; **p<0.05; ***p<0.01 |

  

| Odds Ratio ( 95 CI)        |                             |
|----------------------------|-----------------------------|
| <i>Dependent variable:</i> |                             |
| Responders                 |                             |
| miR.155                    | 0.954 (0.603, 1.507)        |
| Constant                   | 0.873 (0.596, 1.280)        |
| Observations               | 109                         |
| R <sup>2</sup>             | 0.001                       |
| $\chi^2$                   | 0.042 (df = 1)              |
| <i>Note:</i>               | *p<0.1; **p<0.05; ***p<0.01 |

**Figure S2.** Univariate analysis of Let 7a, miRNA-145 and miRNA-155 expression as an independent predictor of response. (A) Let 7a. (B). miRNA-145. (C) miRNA-155. Observations = *n* (indicated for each).

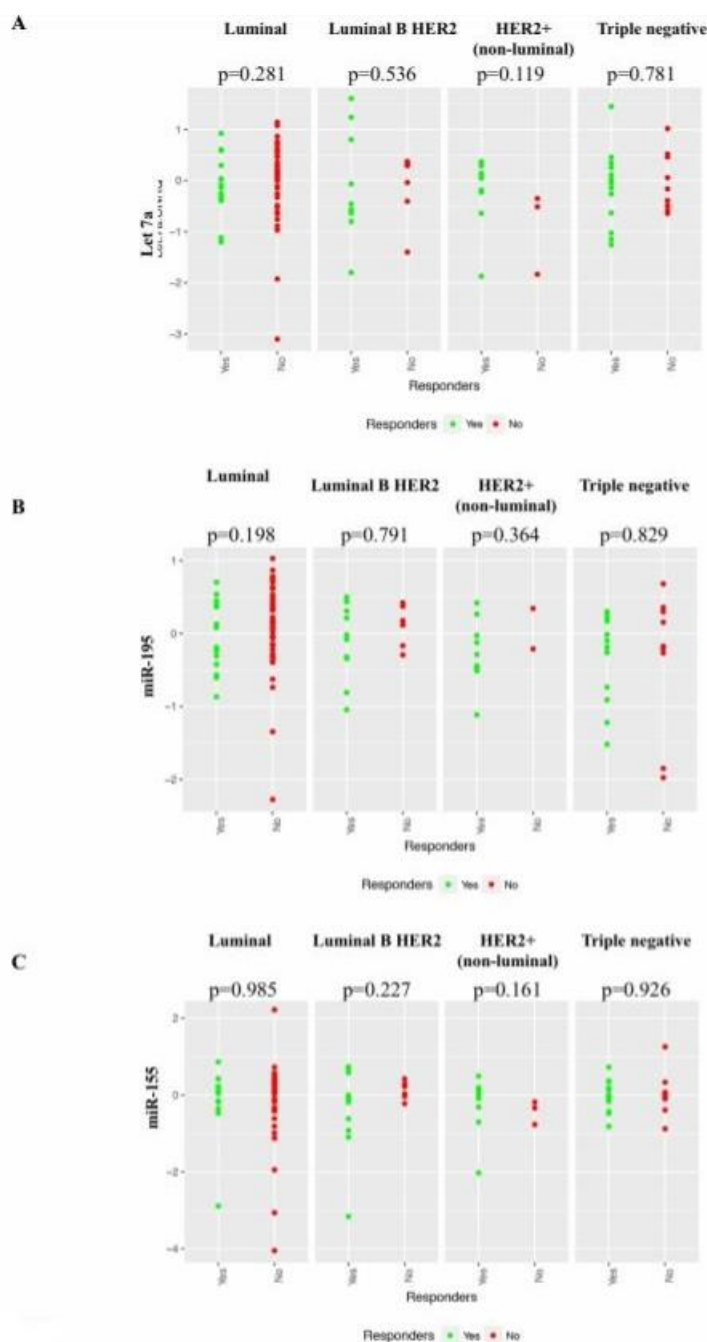

**Figure S3.** Variation in expression of each target miRNA by response to NACT was assessed in the four breast cancer subtypes. **(A)** Let 7a. **(B)** miR-195. **(C)** miR-155. Luminal (responders  $n = 15$ , non-responders  $n = 41$ ), Luminal B Her2 (responders  $n = 12$ , non-responders  $n = 7$ ), Her2+ (non-luminal) (responders  $n = 10$ , non-responders  $n = 3$ ), Triple negative (responders  $n = 14$ , non-responders  $n = 9$ ).  $p < 0.05$  considered significant.

**Table S1.** Diagnostic accuracy of miRNA and complete response.

| Target miRNA | Complete Response<br>AUC (Sensitivity, Specificity) |
|--------------|-----------------------------------------------------|
| Let-7a       | 56.8% (45.2%, 68.5%)                                |
| miR-21       | 58.3% (46.7%, 69.9%)                                |
| miR-145      | 51.5% (39.4%, 63.6%)                                |
| miR-155      | 53.9% (42.5%, 65.3%)                                |
| miR-195      | 67.1% (56.0%, 78.3%)                                |
